# Supplementary material
Source: ML conference proceedings conference paper supplement (https://openreview.net/forum?id=mXQslpfSU5)

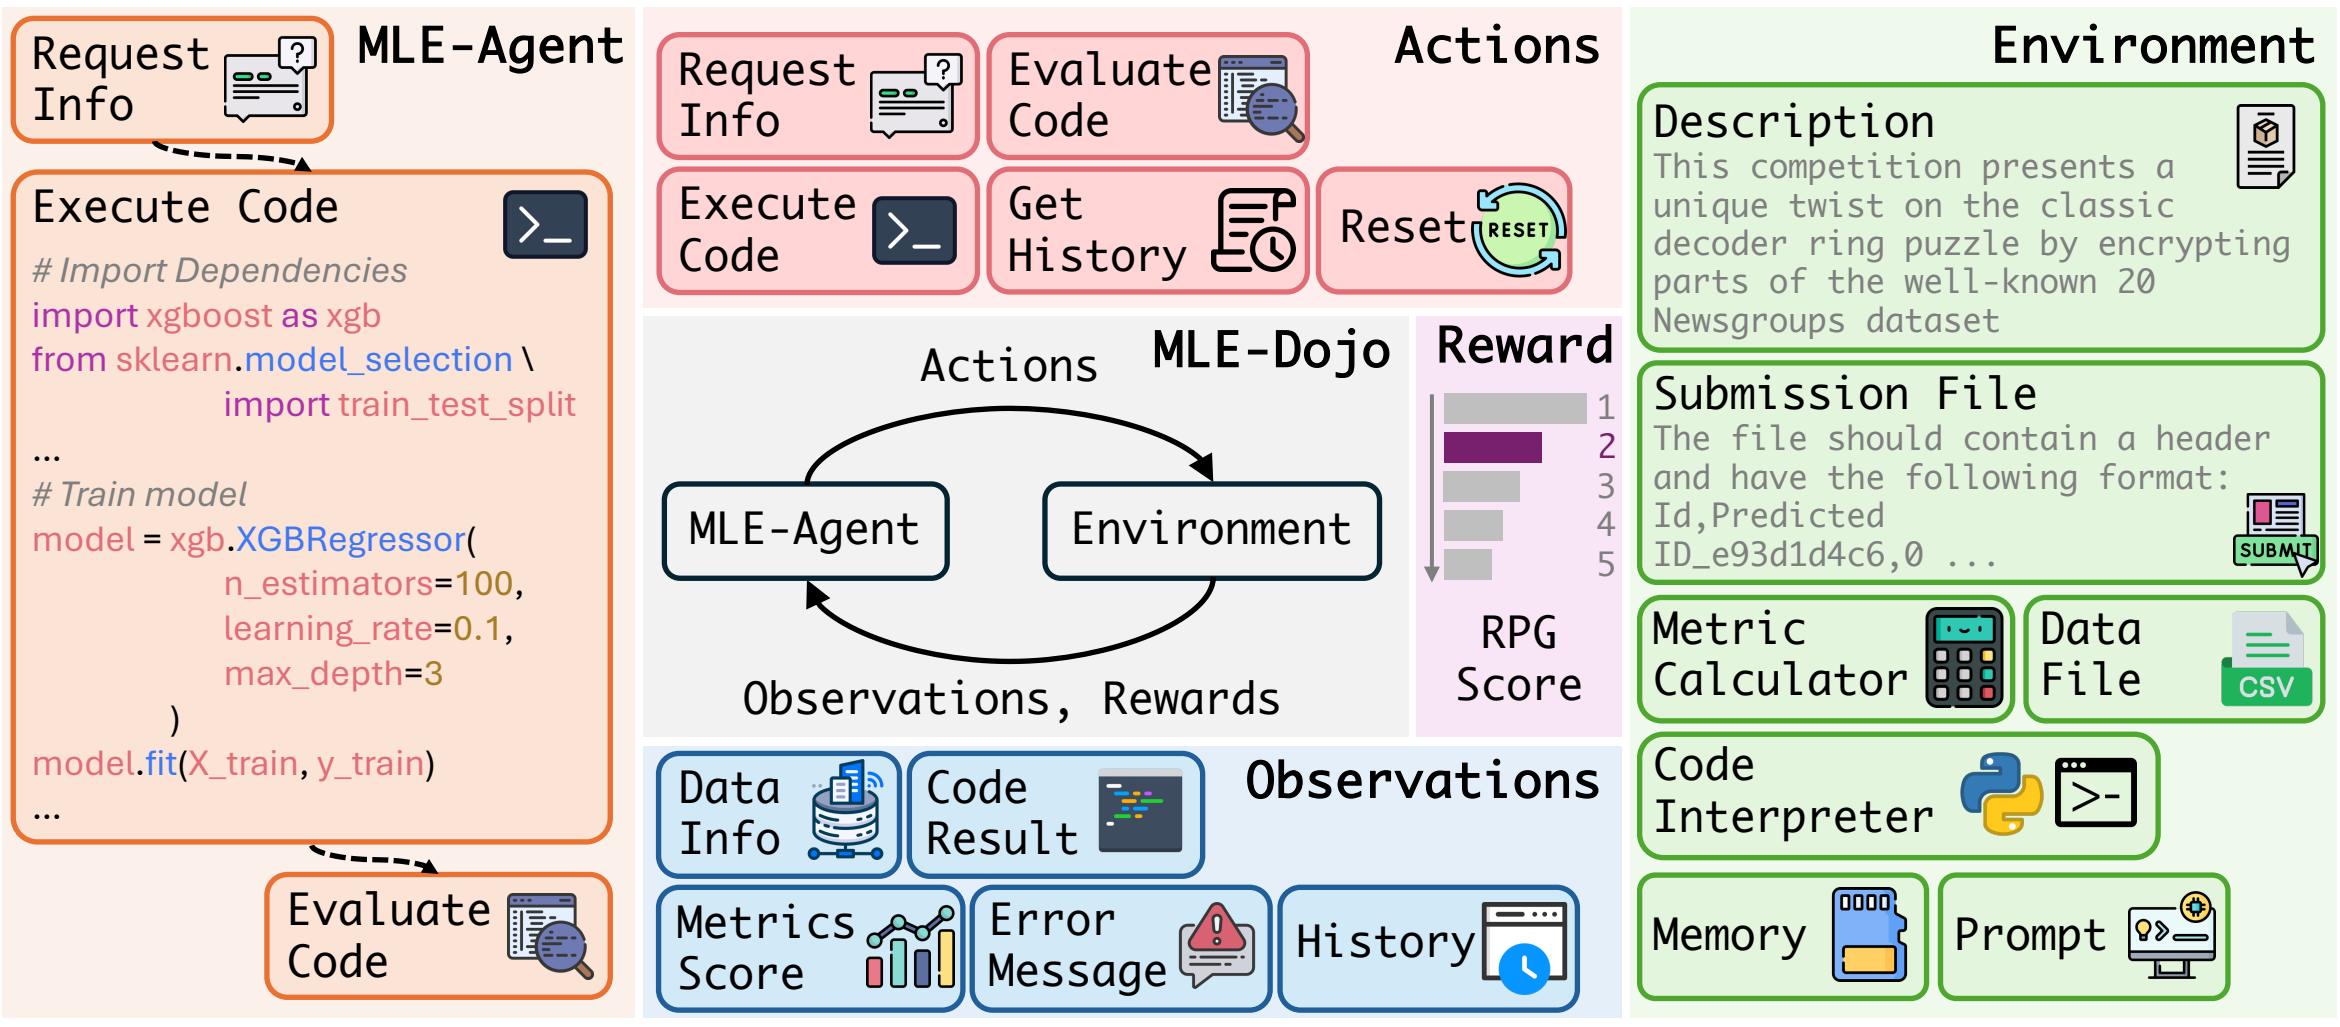

Supplement: supplementary_material [file fig-overview.pdf › mle-smith-supp/MLE-Dojo/assets/fig-overview.pdf]
